# Supplementary material for: Structure of the tsunamigenic plate boundary and low-frequency earthquakes in the southern Ryukyu Trench
Source: PubMed Central journal article supplement (PMC4961848; doi:10.1038/ncomms12255), 2016-07-22
Supplement: ncomms12255-s1.pdf [file ncomms12255-s1.pdf]

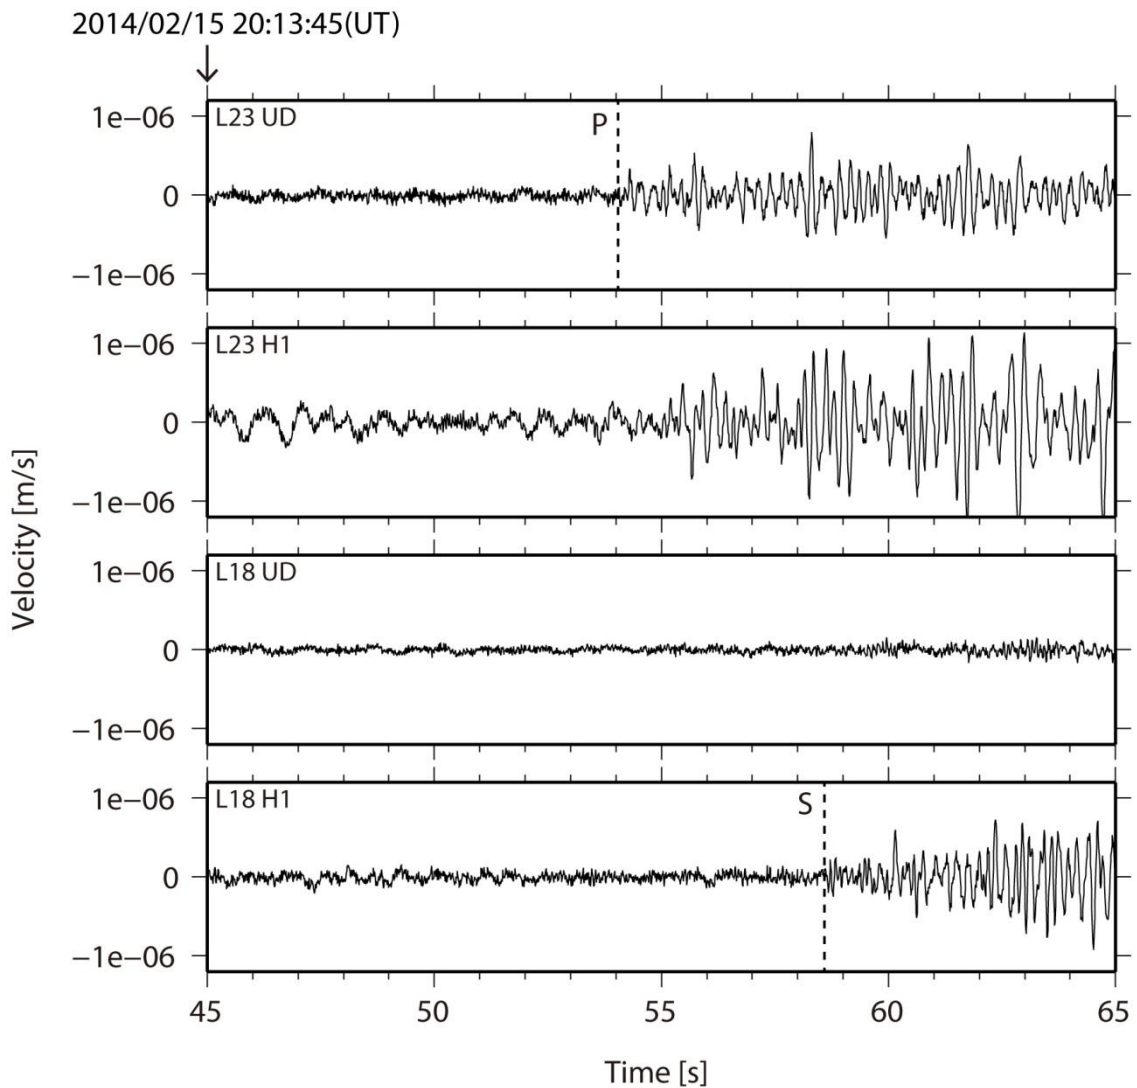

1  
2  
3  
4  
5  
6  
7  
8

**Supplementary Figure 1. Examples of raw seismograms of low-frequency earthquakes (LFEs) (sequence-C).** Vertical and horizontal components of L23 and L18 from top to bottom. Dashed lines indicate P- and S-wave arrival times manually picked from the waveform data.

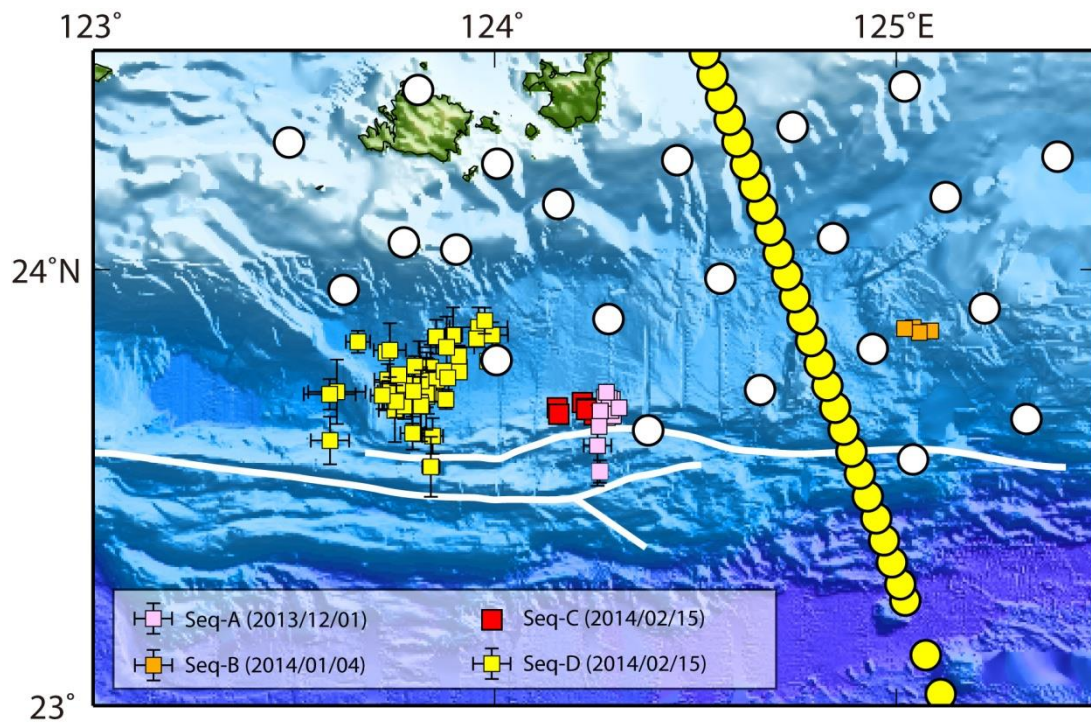

9

10 **Supplementary Figure 2. Distribution of low-frequency earthquakes (LFEs) and**

11 **their location errors.** For estimating location errors of LFEs (sequence-A, -B, and -D),

12 we calculated their standard deviations by using the bootstrap method<sup>1</sup> using 50

13 different traveltimes data sets. Black bars attached to each event indicate 1 standard

14 deviation in the longitudinal/latitudinal directions. Yellow and white circles indicate the

15 positions of ocean-bottom seismometers (OBSs) for active and passive sources,

16 respectively. White lines are potential strike-slip faults proposed by ref. 2. Note that

17 sequence-B and most of the sequence-D do not overlap the potential strike-slip faults

18 and this separation is ensured by the small location errors of LFEs. Sequence-D is

19 located within the forearc basin where the seafloor is flat and no major fault is

20 recognized in the reflection sections (Supplementary Figure 3).

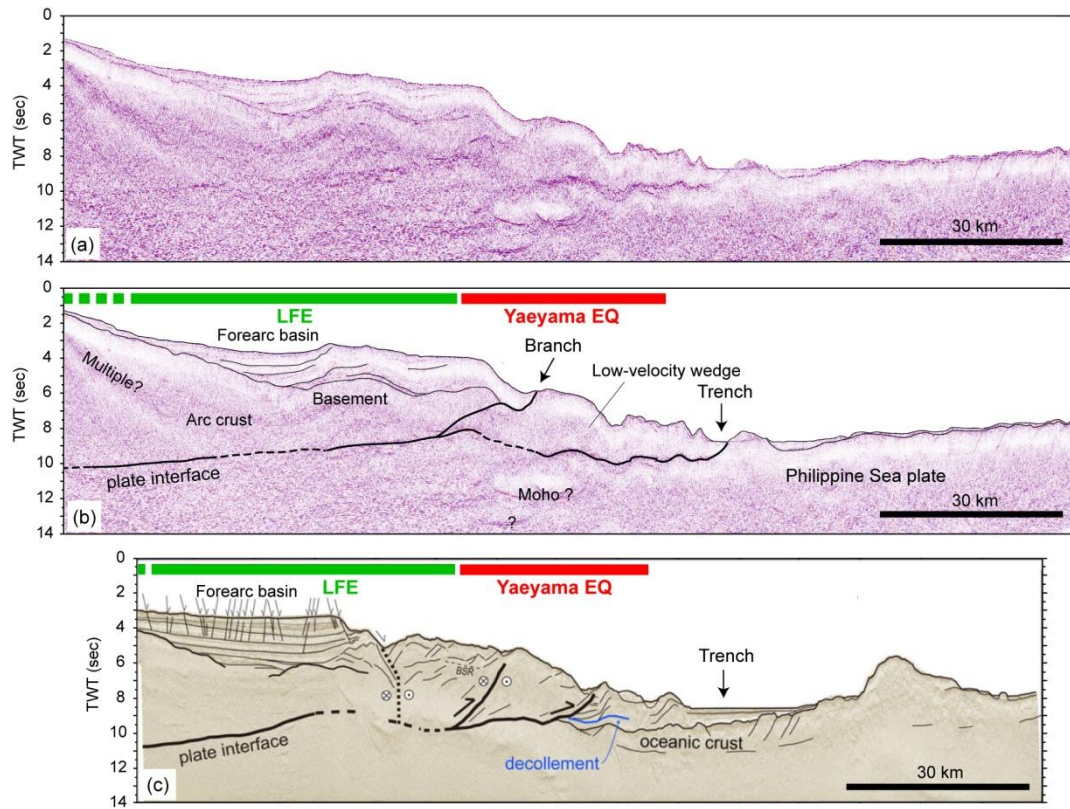

21

22 **Supplementary Figure 3. Comparison of the forearc structure in the southern**

23 **Ryukyu Trench.** (a) Time migrated section of this study and (b) its interpretation.

24 Panel (c) is from ref. 2. The location of the profile is shown in Figure 1. Color bars on

25 the panels (b) and (c) represent the distribution of the Yaeyama earthquake<sup>3</sup> and

26 low-frequency earthquakes (LFEs) constrained by this study.

27

28



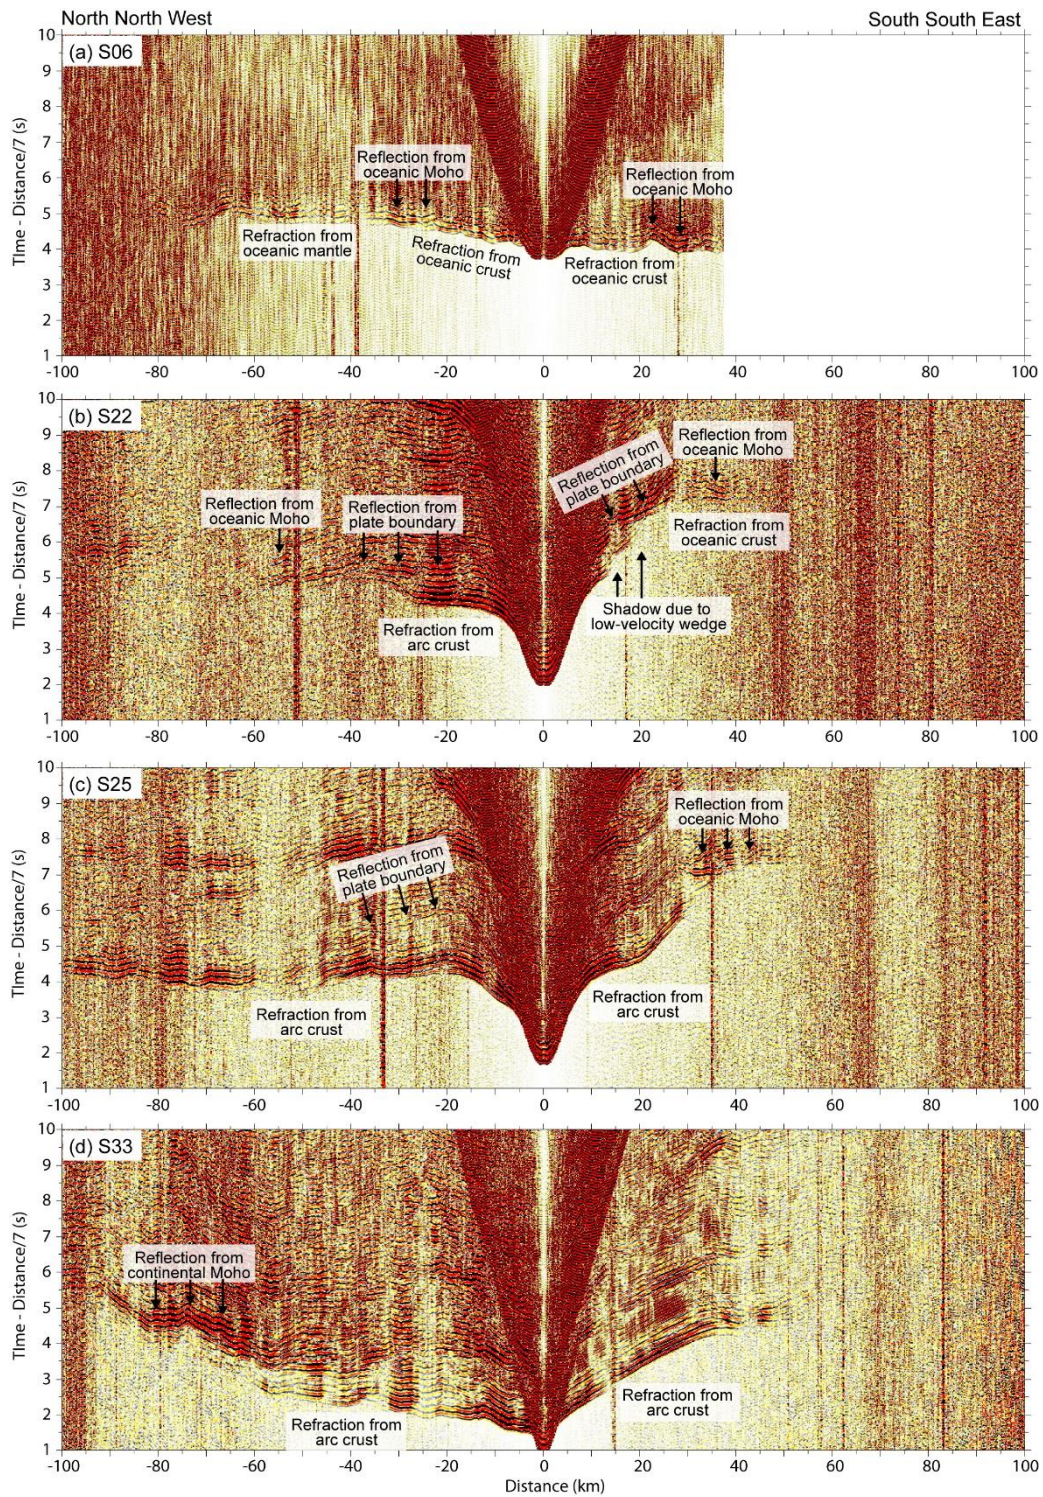

29

30 **Supplementary Figure 4. Examples of the ocean bottom seismograph (OBS)**

31 **records from the active source experiment. (a) S06. (b) S22. (c) S25. (d) S33. For**

32 **each record, 3–12 Hz band-pass filter is applied. To compensate for geometrical**



33 spreading, each trace is normalized by its offset. Locations of the OBSs are shown in

34 Figure 1.

35

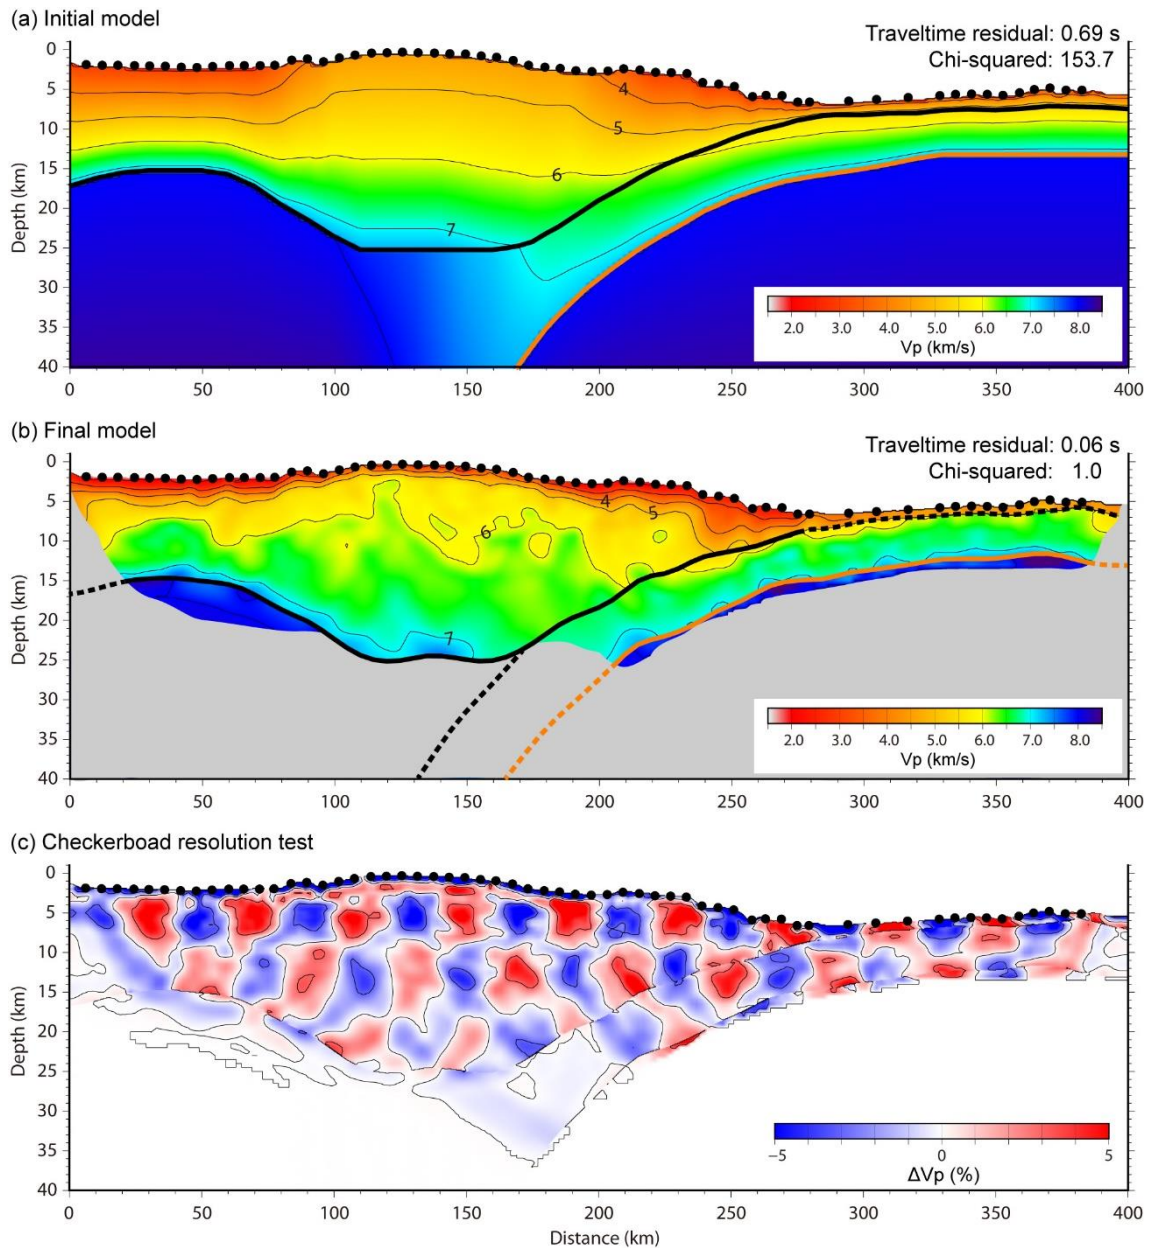

36

37 **Supplementary Figure 5. P-wave velocity models and the result of checkerboard**

38 **resolution test.** (a) Initial model used in this study. To construct the initial model, we

39 referred to P-wave velocity models in the northern and middle Ryukyu subduction  
40 zone<sup>4,5</sup>. Thick black and orange lines indicate initial locations of the plate  
41 boundary/continental Moho and the Moho of the incoming oceanic plate, respectively.  
42 Black dots show the locations of ocean bottom seismographs (OBSs). (b) Final velocity  
43 model. The traveltimes chi-squared residual converged 1.0 after 12 iterations. Areas with  
44 poor checkerboard recovery are masked. Dashed parts of the bold lines are not  
45 constrained by the data. (c) Result of checkerboard resolution test. For this test, the  
46 same ray paths were used as for the final solution. A reference model was created by  
47 adding sinusoidal anomalies with a maximum relative amplitude of 5 % to the final  
48 model. The vertical and horizontal sizes of the anomaly pattern are 7.5 km and 20 km,  
49 respectively.

50

## 51 **Supplementary References**

- 52 1. Efron, B. & Tibshirani, R. J. *An Introduction to the Bootstrap*. Boca Raton (CRC  
53 Press, 1994).
- 54 2. Hsu, S.-K., Yeh, Y.-C., Sibuet, J.-C., Doo, W.-B. & Tsai, C.-H. A mega-splay fault  
55 system and tsunami hazard in the southern Ryukyu subduction zone. *Earth Planet.*  
56 *Sci. Lett.* **362**, 99–107 (2013).

- 57 3. Nakamura, M. Fault model of the 1771 Yaeyama earthquake along the Ryukyu  
58 Trench estimated from the devastating tsunami. *Geophys. Res. Lett.* **36**, L19307  
59 (2009).
- 60 4. Iwasaki, T. et al. Crustal and upper mantle structure in the Ryukyu Island Arc  
61 deduced from deep seismic sounding. *Geophys. J. Int.* **102**, 631-651 (1990).
- 62 5. Kodaira, S. et al. Crustal structure across the middle Ryukyu trench obtained from  
63 ocean bottom seismographic data. *Tectonophysics* **263**, 39-60 (1996).
